# Supplementary material for: Can We Trust the Literature on Risk Factors and Triggers for Low Back Pain? A Systematic Review of a Sample of Contemporary Literature
Source: Hindawi journal article supplement (doi:10.1155/2019/6959631), 2019-05-12
Supplement: f1 [file 6959631.f1.pdf]

Table 4. Associated factors domains studied in all included studies regardless of the LBP definition

| First author,<br>Year,<br>Country | Demographic | Socioeconomic | Anthropometric | Health | History<br>of LBP | Physical<br>examination<br>findings | Posture | Lifestyle | Work<br>ergonomics,<br>Stress at work | Psychologic/<br>Psychosocial | Sport | Pain attitudes:<br>Work/physical activities<br>worsens pain, Pain attitudes<br>in general | Other |
|-----------------------------------|-------------|---------------|----------------|--------|-------------------|-------------------------------------|---------|-----------|---------------------------------------|------------------------------|-------|-------------------------------------------------------------------------------------------|-------|
| Aggarwal<br>2016<br>India         |             |               |                |        |                   |                                     |         | X         | X                                     | X                            |       | X                                                                                         | X     |
| Alperovitch<br>2010<br>Israel     |             |               |                | X      |                   |                                     |         | X         | X                                     | X                            |       |                                                                                           |       |
| Auvinen<br>2010<br>Finland        |             | X             | X              |        | X                 |                                     |         | X         |                                       | X                            |       |                                                                                           |       |
| Capkin<br>2015<br>Turkey          | X           | X             |                | X      | X                 |                                     |         | X         |                                       |                              |       |                                                                                           |       |
| Cho 2012<br>South Korea           | X           |               |                | X      |                   | X                                   |         | X         |                                       |                              |       |                                                                                           |       |
| Coenen<br>2013<br>Netherlands     | X           |               |                |        | X                 |                                     |         | X         | X                                     |                              |       |                                                                                           |       |
| Erick 2014<br>Australia           | X           |               | X              |        |                   |                                     |         | X         | X                                     | X                            |       |                                                                                           |       |
| Ernat 2012<br>North<br>America    | X           |               |                |        |                   |                                     |         |           | X                                     |                              |       |                                                                                           |       |
| Fajardo<br>2016<br>Colombia       | X           |               | X              | X      |                   | X                                   |         | X         | X                                     |                              |       |                                                                                           |       |
| Gaowgzeh<br>2015<br>S Arabia      | X           |               |                | X      | X                 |                                     |         |           | X                                     |                              |       |                                                                                           |       |
| Gold 2017<br>North<br>America     | X           |               | X              | X      |                   |                                     |         | X         | X                                     |                              |       |                                                                                           |       |
| Hussain<br>2017<br>Pakistan       |             |               |                |        |                   |                                     | X       |           | X                                     | X                            |       |                                                                                           |       |
| Jia 2016<br>China                 | X           |               | X              |        |                   |                                     |         | X         | X                                     | X                            |       |                                                                                           |       |
| Kanchanom<br>ai 2015<br>Thailand  | X           |               | X              | X      |                   |                                     |         | X         | X                                     |                              |       |                                                                                           |       |

|                                  |   |   |   |   |   |   |   |   |   |
|----------------------------------|---|---|---|---|---|---|---|---|---|
| Katsavouni<br>2015<br>Greece     | X |   | X |   |   |   | X | X |   |
| Kelley 2017<br>North<br>America  | X |   |   |   | X |   |   | X |   |
| Kherad<br>2016<br>Sweden         | X | X | X | X | X |   | X |   |   |
| Knox 2014<br>North<br>America    | X |   |   |   |   |   |   | X |   |
| Labbafineja<br>d 2016<br>Iran    | X | X |   |   |   | X | X | X | X |
| Lalluka<br>2016<br>Finland       | X |   | X |   |   |   | X | X |   |
| Lin 2012<br>Taiwan               | X |   |   |   | X |   |   | X |   |
| Lin 2014<br>Taiwan               | X |   | X | X |   |   | X | X |   |
| Mattila<br>2017<br>Finland       |   |   |   |   | X | X |   |   |   |
| Mikkonen<br>2016<br>Finland      |   | X | X |   |   |   | X |   | X |
| Mitchell<br>2010<br>Australia    | X |   | X |   | X | X | X |   | X |
| Mohd<br>Anuar 2016<br>Malaysia   | X |   | X |   |   |   |   | X |   |
| Mohseni-<br>Bandpei<br>2011 Iran | X |   | X | X |   |   | X | X |   |
| Murtezani<br>2011<br>Kosovo      | X |   | X |   |   |   | X | X |   |
| Ng 2014<br>Australia             | X |   | X |   |   |   |   |   | X |
| Nissen 2014<br>Denmark           | X |   | X |   |   |   | X | X | X |

|                                   |   |   |   |   |   |   |   |   |   |   |
|-----------------------------------|---|---|---|---|---|---|---|---|---|---|
| Noda 2015<br>Singapore            | X | X | X |   |   |   | X | X | X |   |
| Rafeemanesh 2017<br>Iran          | X |   | X | X |   |   | X |   |   |   |
| Ramond-Roquin 2015<br>France      | X |   | X |   |   |   |   | X | X |   |
| Shemory 2016<br>North America     |   |   | X |   |   |   | X |   | X |   |
| Sikiru 2010<br>Nigeria            | X |   |   |   | X |   |   | X |   | X |
| Simsek 2017<br>Turkey             | X |   | X |   |   |   | X | X | X |   |
| Steffens 2015<br>Australia        |   |   |   |   |   |   | X | X | X | X |
| Sterud 2016<br>Norway             | X |   |   |   |   |   |   | X | X |   |
| Triki 2015<br>Tunisia             | X |   | X |   |   | X | X |   |   | X |
| Udom 2016<br>Thailand             | X |   | X | X |   | X | X | X | X |   |
| van Hilst 2015<br>Netherlands     | X |   | X | X |   |   |   | X |   | X |
| Vandergrift 2012<br>North America | X |   | X |   |   |   |   | X | X |   |
| Vargas-Prada 2013<br>Spain        | X |   |   | X | X |   | X | X | X |   |
| Villar Furtado 2014<br>Brazil     | X |   | X | X | X | X | X |   | X |   |
| Yang 2016<br>North America        | X | X | X |   |   |   | X | X | X |   |
| Ye 2016<br>China                  | X | X | X |   | X |   |   | X |   |   |

|          |   |   |   |   |
|----------|---|---|---|---|
| Yue 2012 | X | X | X | X |
| China    |   |   |   |   |
